## CORRECTION

## Correction: A foot and mouth disease ranking of risk using cattle transportation

Fausto Moreno, Juan Galvis, Francisco Gómez

In subsection Super-spreading nodes identification from section Materials and Methods, a reference is omitted from the second sentence of the second paragraph.

The correct sentence is: The work herein presented focused on particular nodal centrality measurements that capture livestock transportation features linked to these super-spreaders and that may increase FMD spreading chance [1].

The reference is: Gómez, Francisco, et al. "Identification of Super-Spreaders of Foot-and-Mouth Disease in the cattle transportation network: The 2018 outbreak case in Cesar (Colombia)."; 2019 4th World Conference on Complex Systems (WCCS). IEEE, 2019.

## Reference

1. Moreno F, Galvis J, Gómez F (2023) A foot and mouth disease ranking of risk using cattle transportation. PLoS ONE 18(4): e0284180. <https://doi.org/10.1371/journal.pone.0284180> PMID: 37053149

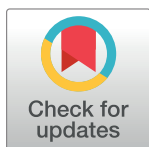

## OPEN ACCESS

**Citation:** Moreno F, Galvis J, Gómez F (2023) Correction: A foot and mouth disease ranking of risk using cattle transportation. PLoS ONE 18(11): e0294615. <https://doi.org/10.1371/journal.pone.0294615>

**Published:** November 14, 2023

**Copyright:** © 2023 Moreno et al. This is an open access article distributed under the terms of the [Creative Commons Attribution License](https://creativecommons.org/licenses/by/4.0/), which permits unrestricted use, distribution, and reproduction in any medium, provided the original author and source are credited.
